# Supplementary material
Source: PubMed Central journal article supplement (PMC8564714)

# Contents

|          |                                               |           |
|----------|-----------------------------------------------|-----------|
| <b>1</b> | <b>Model Overview</b>                         | <b>2</b>  |
| 1.1      | Hierarchical Models . . . . .                 | 2         |
| 1.2      | Cancer Incidence . . . . .                    | 3         |
| 1.3      | Stage Distribution . . . . .                  | 3         |
| 1.4      | Maximum Achievable Survival . . . . .         | 9         |
| 1.5      | Modality Efficacy . . . . .                   | 10        |
| 1.5.1    | Priors . . . . .                              | 10        |
| 1.5.2    | Consensus Results . . . . .                   | 11        |
| 1.5.3    | Modern Modalities . . . . .                   | 11        |
| 1.6      | Treatment Availability . . . . .              | 12        |
| 1.7      | Imaging Availability . . . . .                | 13        |
| 1.8      | Quality of Care . . . . .                     | 13        |
| <b>2</b> | <b>Model Calibration</b>                      | <b>14</b> |
| 2.1      | Calibration Overview . . . . .                | 14        |
| 2.2      | Model Performance . . . . .                   | 14        |
| 2.2.1    | Training Set Comparisons . . . . .            | 14        |
| 2.2.2    | Testing Set Comparisons . . . . .             | 17        |
| <b>3</b> | <b>Calibrated Treatment Impact Parameters</b> | <b>18</b> |
| <b>4</b> | <b>Additional Results</b>                     | <b>20</b> |

# 1 Model Overview

We briefly describe here a previously developed microsimulation (individual-level) model of global cancer survival - see Ward 2020 for more details. The model simulates survival for 11 cancers in 200 countries/territories. The cancer sites were selected based on which comparable topography codes from the International Classification of Diseases for Oncology (3rd edition) were available in both GLOBOCAN 2018 and CONCORD-3: oesophagus (C15), stomach (C16), colon (C18), rectum (C19–20), anus (C21), liver (C22), pancreas (C25), lung (C33–34), breast (C50), cervix uteri (C53), and prostate (C61). The model simulates the number of incident (diagnosed) cancer cases in each country/territory and models the individual-level cancer treatment cascade and survival outcome for each patient with cancer.

Here we present an overview of the conceptual model, along with the data sources used to inform various aspects of the model development.

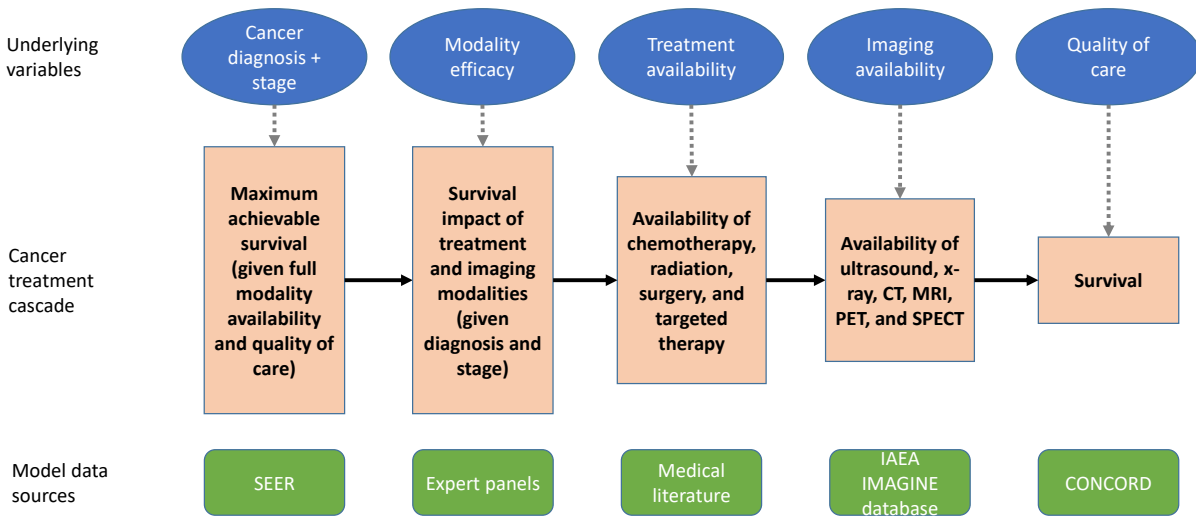

Reference: Ward ZJ, Scott AM, Hricak H, et al. Estimating the impact of treatment and imaging modalities on 5-year net survival of 11 cancers in 200 countries: a simulation-based analysis. *Lancet Oncol* 2020; 21: 1077-88.

## 1.1 Hierarchical Models

We use Bayesian hierarchical models to synthesize data from multiple sources and estimate parameters for countries for which no data are available. In contrast to no pooling (i.e. every country is different), or complete pooling (i.e. every country is the same), hierarchical models allow for partial pooling of information (i.e. countries in similar income groups and geographic regions likely have similar parameters), which allows for ‘borrowing’ of information from multiple sources. This approach also helps to provide estimates that are more robust to outliers by smoothing, or ‘regularizing’ the country-specific parameters by virtue of the hierarchical structure. For more information on Bayesian data analysis, see Gelman et al. 2014.

We use vertical density plots to display the probability distributions of the model priors and the calibrated posteriors for each country. In these plots, the value of interest (i.e. parameter value) is plotted on the y-axis, with the probability density plotted symmetrically around the origin for visual balance - wider curves correspond to higher probability density.

Reference: Gelman A, Carlin JB, Stern HS, Rubin DB. Bayesian data analysis, 3rd edn. Boca Raton, Florida: CRC Press, 2014.

## 1.2 Cancer Incidence

Estimated breast cancer incidence was obtained from GLOBOCAN 2018, and was available for 178 countries. Estimates were not available for countries with small populations, so we imputed incidence rates from similar countries (ie, similar region and income group). Estimated number of breast cancers were then calculated based on the UN Medium Population estimates for females in 2018.

| Missing                          | Match             |
|----------------------------------|-------------------|
| Andorra                          | Spain             |
| Antigua and Barbuda              | Bahamas           |
| Belize                           | Guatemala         |
| Bermuda                          | Bahamas           |
| Bhutan                           | Nepal             |
| Brunei Darussalam                | Malaysia          |
| Cabo Verde                       | Senegal           |
| Cayman Islands                   | Bahamas           |
| Comoros                          | Madagascar        |
| Djibouti                         | Eritrea           |
| Dominica                         | Jamaica           |
| Faroe Islands                    | Iceland           |
| Gambia                           | Senegal           |
| Greenland                        | Iceland           |
| Grenada                          | Jamaica           |
| Iceland                          | Norway            |
| Kiribati                         | Fiji              |
| Liechtenstein                    | Switzerland       |
| Maldives                         | Sri Lanka         |
| Marshall Islands                 | Fiji              |
| Micronesia (Fed. States of)      | Fiji              |
| Monaco                           | France            |
| Nauru                            | Fiji              |
| Palau                            | Fiji              |
| Saint Kitts and Nevis            | Bahamas           |
| Saint Vincent and the Grenadines | Jamaica           |
| Samoa                            | Fiji              |
| San Marino                       | Italy             |
| Sao Tome and Principe            | Equatorial Guinea |
| Seychelles                       | Comoros           |
| Taiwan                           | South Korea       |
| Timor-Leste                      | Indonesia         |
| Tonga                            | Samoa             |
| Tuvalu                           | Samoa             |
| Vanuatu                          | Papua New Guinea  |

## 1.3 Stage Distribution

Due to the paucity of data on cancer stage distribution at diagnosis, we performed a literature review to obtain estimates of country-specific and cancer-specific stage distribution, which yielded estimates from 162 studies in 84 countries.

We used a hierarchical modelling approach to regularize the stage distribution estimates, and to make

estimates for countries with no data.

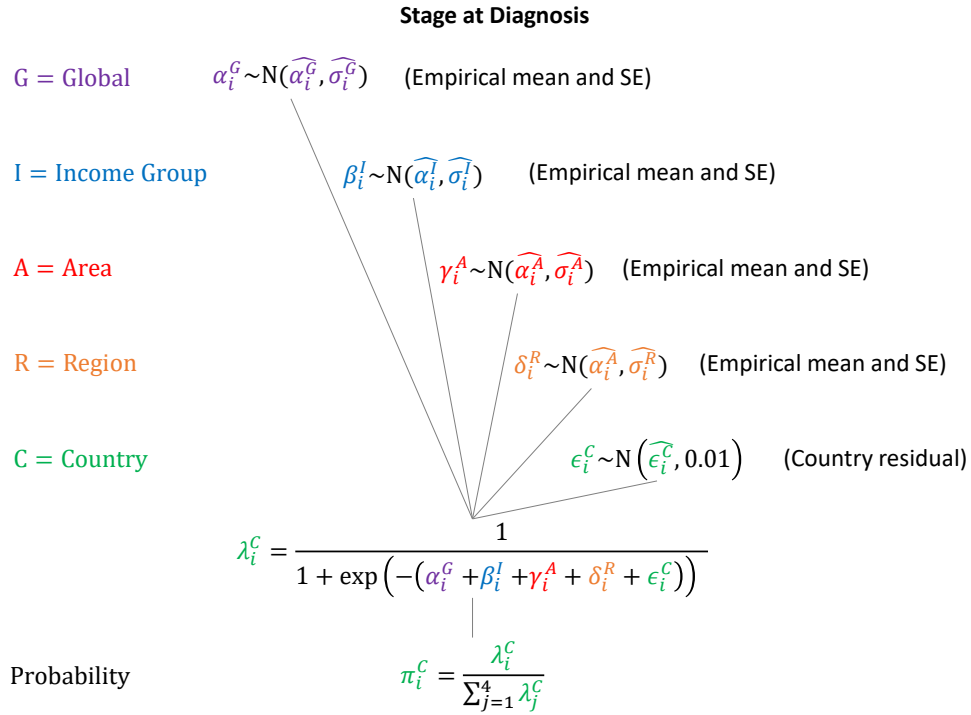

We weighted the estimates by the total number of cases for which stage was reported. To guard against over-fitting to individual country data we reduced the magnitude of the country-level residuals by 75%.

When drawing stage in the model, we used raking to estimate joint probabilities of stage and age. Initial joint probabilities of age and stage were estimated from SEER 2010-16 data using AJCC stage groups, 7 edition. Raking was then performed until convergence was achieved with the target marginal distributions: 1) estimated stage distribution and 2) age distribution from GLOBOCAN. Uniform priors were put on age distribution by stage (i.e. Beta(1, 1)) to avoid initial weights of 0 for raking.

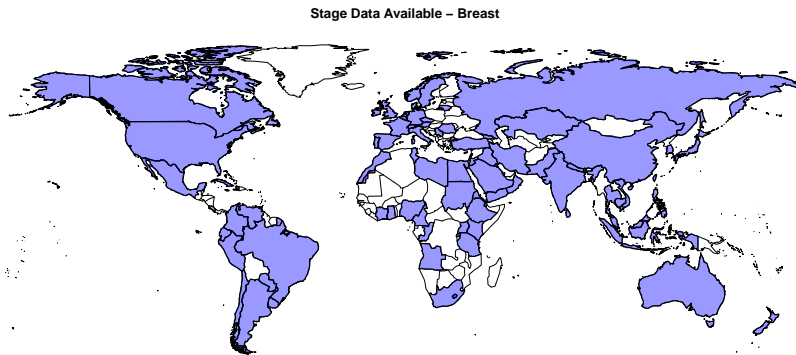

Stage at Diagnosis, Breast

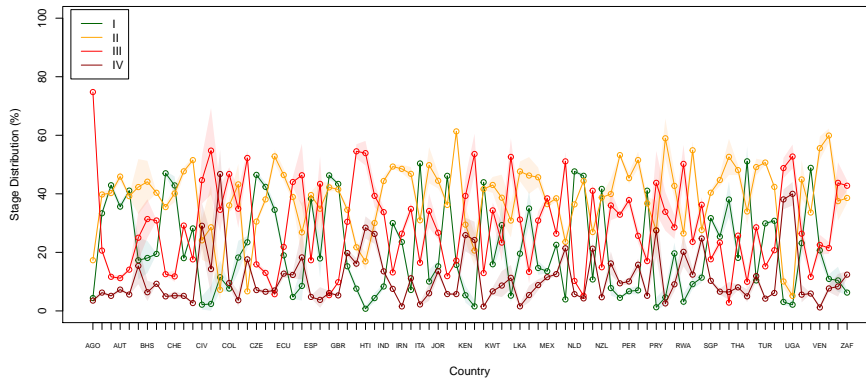

Global: Breast

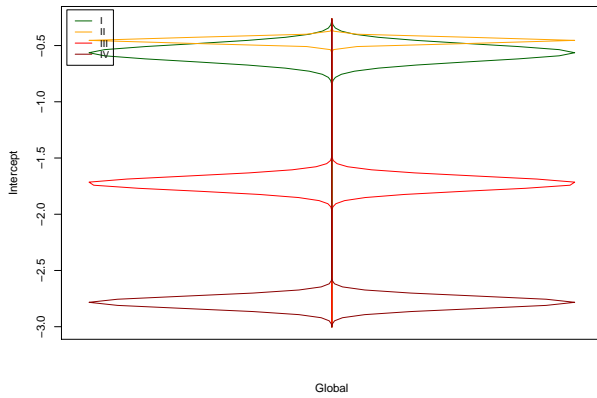

Income Group: Breast

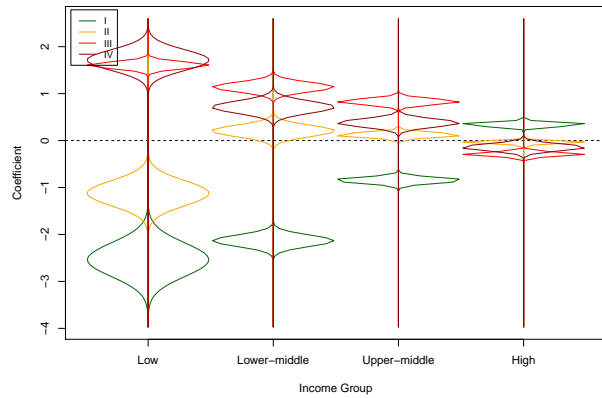

Area: Breast

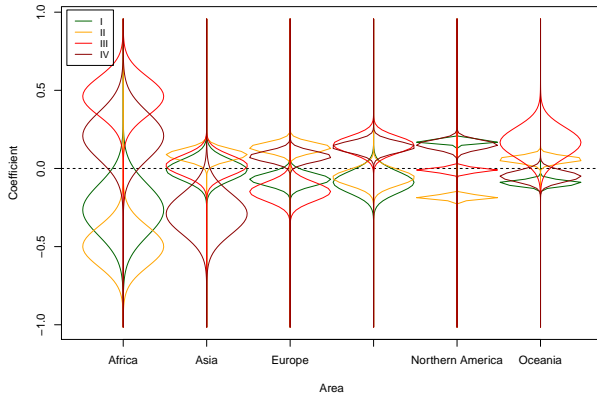

Africa: Breast

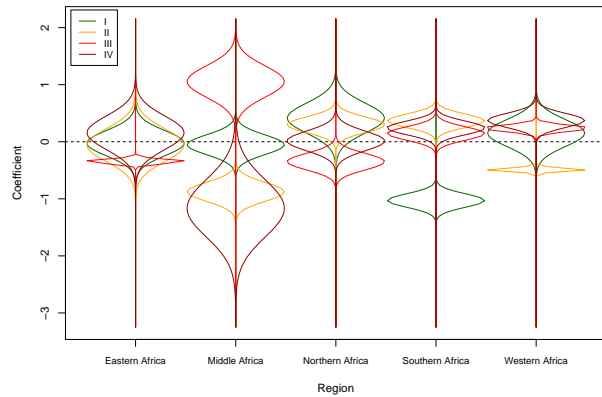

Asia: Breast

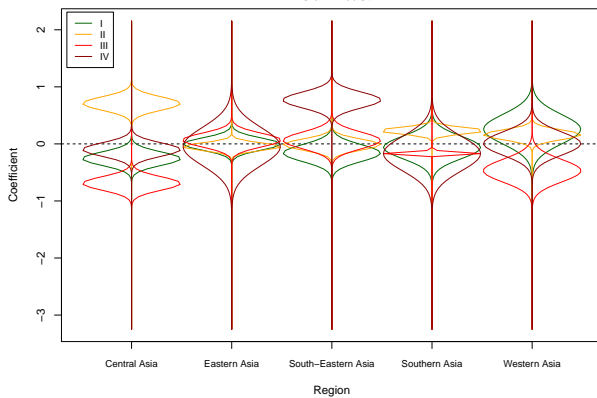

Europe: Breast

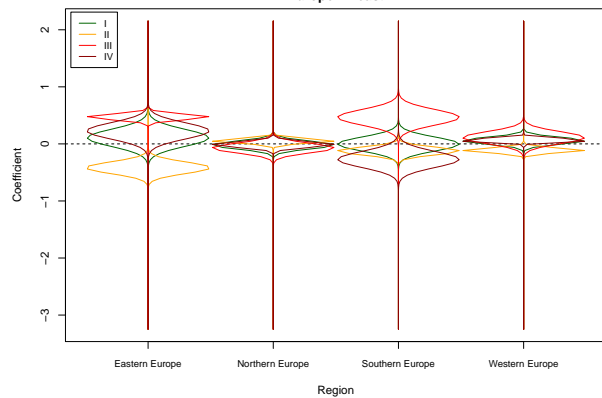

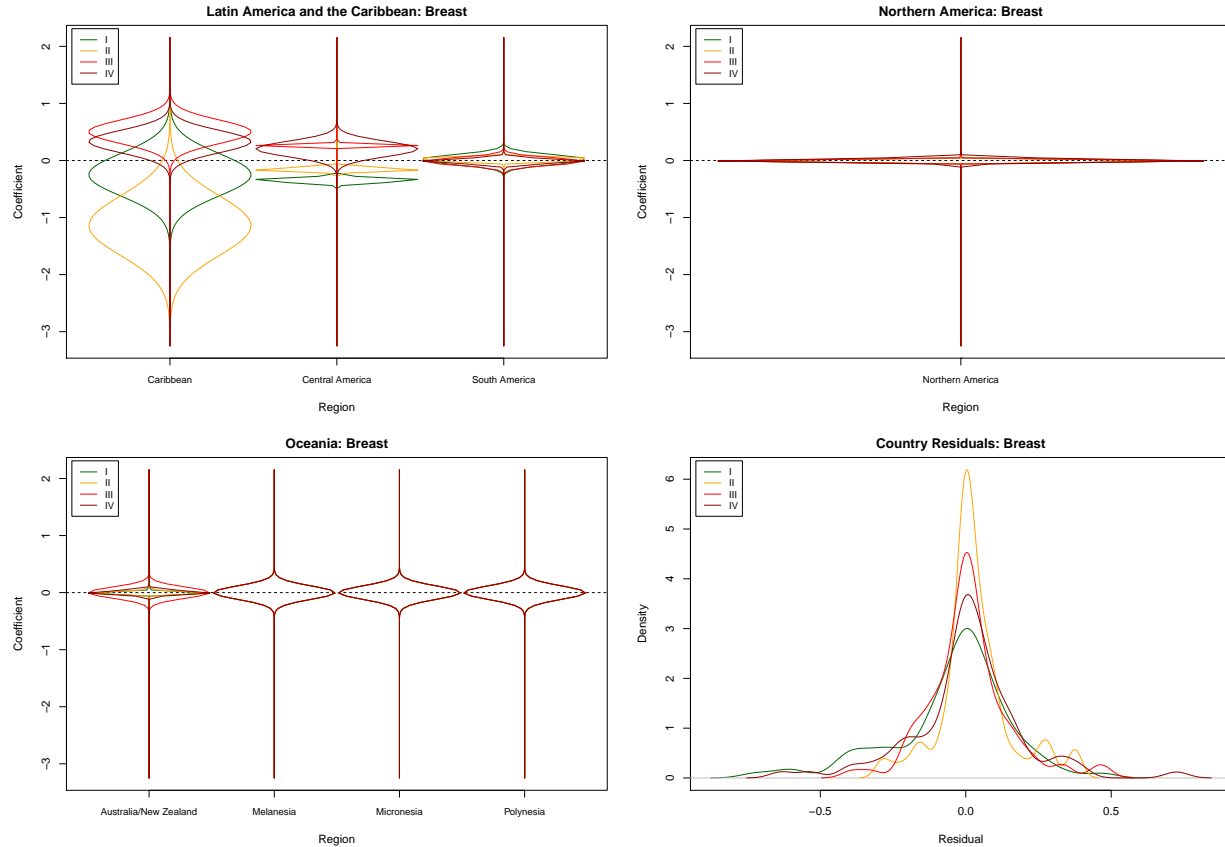

## References

| Country | Cases  | Years     | Source                                                                                                                                                                                                 | Reference                       |
|---------|--------|-----------|--------------------------------------------------------------------------------------------------------------------------------------------------------------------------------------------------------|---------------------------------|
| AGO     | 162    | 2011      | National Oncology Centre of Luanda                                                                                                                                                                     | Armando 2015                    |
| AGO     | 1323   | 2006-2014 | Tertiary hospital in Luanda                                                                                                                                                                            | Lopes 2015                      |
| AGO     | 132    | 2011-2014 | Angolan Institute of Cancer Control and Clínica Sagrada Esperança, Luanda                                                                                                                              | Miguel 2017                     |
| ARG     | 2457   | 2012-2016 | Institutional Tumor Registry of Argentina (RITA)                                                                                                                                                       | Abriata 2019                    |
| ARG     | 3383   |           | [Systematic review: de Lemos 2019]                                                                                                                                                                     | Elizalde 2013                   |
| ARG     | 303    |           | [Systematic review: de Lemos 2019]                                                                                                                                                                     | Grippio 2015                    |
| ARG     | 281    |           | [Systematic review: de Lemos 2019]                                                                                                                                                                     | Juarez 2009                     |
| AUS     | 3935   | 2017      | Victoria Cancer Registry                                                                                                                                                                               | Victoria Cancer Registry 2019   |
| AUS     | 4457   | 2011      | New South Wales Cancer Registry                                                                                                                                                                        | Lawrance 2019                   |
| AUT     | 3913   | 1988-2000 | Cancer Registry of Tyrol                                                                                                                                                                               | Oberaigner 2006                 |
| BEL     | 25178  | 2004-2006 | Three databases were linked at the patient level: the Cancer Registry, the population and the claims databases                                                                                         | Vrijens 2012                    |
| BHR     | 104    | 2010-2013 | Salmaniya Medical Complex, Manama                                                                                                                                                                      | AlZaman 2016                    |
| BHS     | 188    | 2009-2011 | National Oncology Board of the Bahamas                                                                                                                                                                 | Mungrue 2016                    |
| BRA     | 201079 | 2001-2014 | A network of SUS-affiliated hospital-based cancer registries (Registros hospitalares de cancer [RHC])                                                                                                  | Dos-Santos-Silva 2019           |
| CAN     | 16407  | 2011-2015 | Canadian Cancer Registry                                                                                                                                                                               | Canadian Cancer Statistics 2018 |
| CHE     | 1017   | 2003-2007 | Ticino Cancer Registry                                                                                                                                                                                 | Spitale 2009                    |
| CHL     | 4693   | 2000-2010 | Six public hospitals                                                                                                                                                                                   | Del Castillo Sm 2017            |
| CHN     | 288    | 2004-2006 | First Affiliated Hospital of Inner Mongolia Medical College                                                                                                                                            | Kang 2012                       |
| CHN     | 4187   | 2006-2010 | Four hospitals: Cancer Hospital/Chinese Academy of Medical Sciences, Peking University Cancer Hospital, Beijing Obstetrics and Gynecology Hospital, and Shunyi Maternal and Child Health Care Hospital | Zuo 2017                        |
| CHN     | 1997   | 2008-2010 | Hong Kong Breast Cancer Registry                                                                                                                                                                       | Cheung 2012                     |
| CHN     | 3455   | 1999-2008 | Nationwide multi-center study from 7 geographic regions across China (North, North-East, Central, South, East, North-West, and South-West)                                                             | Li 2011                         |
| CIV     | 141    | 2008-2009 | Abidjan cancer registry                                                                                                                                                                                | Islami 2015                     |
| CMR     | 42     | 2006-2009 | Douala General Hospital                                                                                                                                                                                | Nguefack 2012                   |
| COG     | 139    | 2008-2009 | Brazzaville cancer registry                                                                                                                                                                            | Islami 2015                     |
| COL     | 1548   | 2007-2012 | Instituto Nacional de Cancerología of Colombia                                                                                                                                                         | Pardo 2018                      |
| COL     | 233    | 2003-2007 | Manizales population-based Cancer Registry                                                                                                                                                             | Arias-Ortiz 2018                |

(continued)

| Country | Cases  | Years        | Source                                                                                                                           | Reference              |
|---------|--------|--------------|----------------------------------------------------------------------------------------------------------------------------------|------------------------|
| CRI     | 192    | 2009-2010    | San Juan de Dios Hospital of the Costa Rican Social Security System (Caja Costarricense del Seguro Social)                       | Srur-Rivero 2014       |
| CUB     | 54     |              | [Systematic review: de Lemos 2019]                                                                                               | Milián-Mosquera 2015   |
| CUB     | 141    |              | [Systematic review: de Lemos 2019]                                                                                               | Viera-Hernández 2011   |
| CUB     | 1315   |              | [Systematic review: de Lemos 2019]                                                                                               | Gómez-Delgado 2017     |
| CZE     | 7419   | 2015         | Modelled estimates based on data from Czech National Cancer Registry                                                             | Dusek 2015             |
| DEU     | 4383   | 2001-2013    | Population-based Cancer Registry, Dresden                                                                                        | Kast 2017              |
| DNK     | 1735   | 1996-1997    | Danish Cancer Registry                                                                                                           | Jensen 2003            |
| ECU     | 302    |              | [Systematic review: de Lemos 2019]                                                                                               | Martínez 2015          |
| ECU     | 1158   |              | [Systematic review: de Lemos 2019]                                                                                               | Cueva and Yepes 2014   |
| ECU     | 621    |              | [Systematic review: de Lemos 2019]                                                                                               | Cueva and Yepes 2009   |
| EGY     | 3027   | 2004-2008    | Gharbiah cancer registry                                                                                                         | Schlichting 2015       |
| ERI     | 82     | 2007-2008    | General Surgical Units of 3 hospitals: Orotta Medical Surgical National Referral Hospital, Halibet Hospital, and Sembel Hospital | Tesfamariam 2013       |
| ESP     | 2662   | 2000-2014    | Hospital del Mar Tumour Registry                                                                                                 | Parés-Badell 2017      |
| ESP     | 4944   | 2000-2012    | Population-based cancer registry in Granada (southern Spain)                                                                     | Baeyens-Fernandez 2018 |
| ETH     | 106    | 2012-2015    | Tikur Anbessa Specialized Hospital                                                                                               | Hadgu 2018             |
| FRA     | 3978   | 1990-1997    | Cancer Registry of Isere                                                                                                         | Cluze 2009             |
| GBR     | 191086 | 2013-2017    | England ONS                                                                                                                      | ONS 2019               |
| GBR     | 13998  | 2009-2012    | Scotland Cancer Registry                                                                                                         | McMenamin 2017         |
| GEO     | 3580   | 2006-2015    | National population-based cancer registry                                                                                        | Vashakidze 2018        |
| GHA     | 56     | 2013-2016    | Komfo Anokye Teaching Hospital (KATH)                                                                                            | Gyedu 2018             |
| GHA     | 179    | 2013         | Korle Bu Teaching Hospital                                                                                                       | Dedey 2016             |
| GHA     | 463    | 2008-2011    | Komfo Anokye Teaching Hospital (KATH)                                                                                            | Scherber 2014          |
| GHA     | 564    | 2005-2009    | Department of Pathology, University of Ghana Medical School                                                                      | Edmund 2013            |
| GHA     | 330    | 2004-2009    | Komfo Anokye Teaching Hospital (KATH)                                                                                            | Ohene-Yeboah 2012      |
| HTI     | 445    | 2013-2017    | Port-au-Prince                                                                                                                   | Degennaro 2018         |
| HTI     | 93     | 2013-2015    | Innovating Health International Women's Cancer Center (IHL-WCC) in Port-au-Prince                                                | Gomez 2016             |
| IDN     | 421    | 2010         | Dharmais Cancer Centre (DCC)                                                                                                     | Ng 2011                |
| IDN     | 195    | 1998-2002    | Dharmais Cancer Hospital                                                                                                         | Irawan 2008            |
| IND     | 132    | 2010-2011    | University Teaching and Tertiary Referral Hospital, Kashmir                                                                      | Wani 2012              |
| IND     | 2425   | 2005-2014    | Population Based Cancer Registry, Trivandrum                                                                                     | Mathew 2016            |
| IND     | 906    | 2010-2012    | Hospital based cancer registry of a regional cancer center of North-East India                                                   | Krishnatreya 2014      |
| IRL     | 20816  | 1999-2008    | Irish National Cancer Registry                                                                                                   | Walsh 2014             |
| IRN     | 4748   | Not reported | Shiraz Breast Cancer Registry                                                                                                    | Akrami 2018            |
| IRQ     | 479    | 2018         | Duhok                                                                                                                            | Mohammed 2019          |
| IRQ     | 30     | Not reported | College of Medicine, Al-Nahrain University, Baghdad                                                                              | Abdulhussain 2019      |
| IRQ     | 996    | 2011-2015    | Basra Oncology Center                                                                                                            | Abood 2018             |
| IRQ     | 242    | 2006-2008    | Hewa Hematology and Oncology Hospital, Sulaimaniyah province                                                                     | Majid 2009             |
| ITA     | 138    | 2003-2010    | Morgagni-Pierantoni Hospital (Forli)                                                                                             | Amadori 2014           |
| ITA     | 1764   | 2003-2009    | Varese section of the Lombardy Cancer Registry                                                                                   | Tagliabue 2016         |
| JAM     | 65     | 2006-2007    | Hospital-based specialist clinic in Kingston, Jamaica                                                                            | Chin 2014              |
| JAM     | 184    | 2002-2009    | University Hospital of the West Indies                                                                                           | Alfred 2012            |
| JOR     | 348    | 2004-2014    | Jordan University of Science and Technology (JUST) and King Abdullah Teaching University Hospital (KAUH)                         | Ayoub 2019             |
| JOR     | 151    | 2013-2014    | Three hospitals in Central and Northern Jordan                                                                                   | Obeidat 2015           |
| JOR     | 721    | 1997-1998    | Jordan Cancer Registry                                                                                                           | Arkoob 2010            |
| JOR     | 98     | 2000-2002    | Al-Basheer Governmental Hospital                                                                                                 | Atoum 2010             |
| JPN     | 157292 | 2012-2015    | Nationwide hospital-based cancer registries                                                                                      | Okuyama 2018           |
| KAZ     | 4210   | 2014         | Registry data from fourteen regions and two major cities                                                                         | Chukmaitov 2018        |
| KEN     | 125    | 2012-2018    | Aga Khan University Hospital, Nairobi                                                                                            | Ekpe 2019              |
| KEN     | 99     | 2011-2012    | Aga Khan University Hospital, Nairobi                                                                                            | Sayed 2014             |
| KHM     | 194    | 2008-2011    | Sihanouk Hospital Center of Hope, Phnom Penh                                                                                     | Ley 2016               |
| KOR     | 86784  | 1996-2015    | Korean Breast Cancer Society Registry                                                                                            | Park 2019              |
| KWT     | 353    | 1999-2009    | Kuwait Cancer Control Center                                                                                                     | Fayaz 2013             |
| KWT     | 902    | 1999-2004    | Clinical oncologists' data                                                                                                       | Elbasmi 2010           |
| LBN     | 150    | 2009-2014    | American University of Beirut Medical Center (AUBMC)                                                                             | Akel 2017              |
| LBY     | 100    | 2000-2007    | National Cancer Institute, Sabratha                                                                                              | Ermiah 2012            |
| LBY     | 130    | 2000-2006    | African Oncology Institute, Sabratha and Tripoli Medical Center, Tripoli                                                         | Boder 2012             |
| LKA     | 833    | 2006-2012    | University of Ruhuna                                                                                                             | Peiris 2017            |
| LTU     | 240    | 2008         | Kaunas region                                                                                                                    | Ivanauskiene 2012      |
| MAR     | 560    | 2005-2008    | Rabat Cancer Registry                                                                                                            | Mechita 2016           |
| MAR     | 279    | 2010-2015    | Oncology Clinic Al Amal of Tangier                                                                                               | Derkaoui 2016          |
| MEX     | 397    |              | [Systematic review: de Lemos 2019]                                                                                               | Pérez-Michel 2009      |
| MEX     | 816    |              | [Systematic review: de Lemos 2019]                                                                                               | Ángeles-Llerenas 2016  |
| MEX     | 2075   |              | [Systematic review: de Lemos 2019]                                                                                               | Lara-Medina 2011       |

(continued)

| Country | Cases | Years                | Source                                                                                                                                                                                     | Reference                  |
|---------|-------|----------------------|--------------------------------------------------------------------------------------------------------------------------------------------------------------------------------------------|----------------------------|
| MEX     | 4301  |                      | [Systematic review: de Lemos 2019]                                                                                                                                                         | Reynoso-Noverón 2017       |
| MYS     | 328   | 2005-2007            | Three referral medical centres in the East Coast of Malaysia and two government hospitals in Kuala Lumpur                                                                                  | Norsa'adah 2011            |
| MYS     | 447   | 2010                 | University Malaya Medical Centre (UMMC), Kuala Lumpur                                                                                                                                      | Ng 2011                    |
| MYS     | 824   | 2014-2015            | Three large hospitals: University Malaya Medical Centre (UMMC), Kuala Lumpur; Tengku Ampuan Rahimah Hospital (TARH), Klang, Selangor; Queen Elizabeth Hospital (QEH), Kota Kinabalu, Sabah | Wong 2019                  |
| MYS     | 121   | 2007-2013            | Hospital Sultanah Nora Ismail Batu Pahat, Johor                                                                                                                                            | Balasundram 2018           |
| MYS     | 549   | 2007-2011            | Kelantan Cancer Registry                                                                                                                                                                   | Nordin 2018                |
| MYS     | 446   | 2010-2015            | Sarawak General Hospital                                                                                                                                                                   | Yang 2017                  |
| MYS     | 3959  | 2001-2011            | University Malaya Breast Cancer Registry                                                                                                                                                   | Kong 2017                  |
| NGA     | 85    | 2016                 | Lagos University Teaching Hospital (LUTH)                                                                                                                                                  | Awofeso 2018               |
| NGA     | 105   | 2015                 | University College Hospital, Ibadan                                                                                                                                                        | Hafiz 2018                 |
| NGA     | 300   | 2014-2016            | Six secondary and tertiary hospitals in Nigeria                                                                                                                                            | Jedy-Agba 2017             |
| NGA     | 200   | 2005-2008            | Lagos State University Teaching Hospital (LASUTH) Cancer Registry                                                                                                                          | Makanjuola 2014            |
| NGA     | 103   | 2001-2005            | Ahmadu Bello University Teaching Hospital (ABUTH), Zaria, Kaduna State                                                                                                                     | Kene 2010                  |
| NGA     | 34    | 1999-2001            | Jos University Teaching Hospital                                                                                                                                                           | Gukas 2008                 |
| NGA     | 89    | 2004-2005            | Oncology Clinic of the Department of Surgery, University College Hospital, Ibadan                                                                                                          | Adebamowo 2008             |
| NLD     | 31277 | 2015-2016            | Netherlands Cancer Registry                                                                                                                                                                | Walraven 2019              |
| NOR     | 14890 | 2005-2010            | Norwegian Cancer Registry                                                                                                                                                                  | Lousdal 2014               |
| NPL     | 85    | 2016-2017            | Three cancer hospitals of Kathmandu, Nepal                                                                                                                                                 | Bhandari 2017              |
| NPL     | 114   | 2007-2008            | Bir Hospital, Kathmandu and BP Koirala Memorial Cancer Hospital, Bharatpur                                                                                                                 | Acharya 2012               |
| NPL     | 1141  | 1999-2006            | Tertiary care center                                                                                                                                                                       | Jah 2010                   |
| NZL     | 13644 | 2000-2014            | Auckland and Waikato Breast Cancer Registers                                                                                                                                               | Tin Tin 2018               |
| OMN     | 65    | 2015-2016            | Sultan Qaboos University Hospital                                                                                                                                                          | Naik 2017                  |
| OMN     | 118   | 2003-2008            | Sultan Qaboos University Hospital                                                                                                                                                          | Kumar 2011                 |
| OMN     | 150   | 1996-2002            | Sultan Qaboos University Hospital and the Royal Hospital                                                                                                                                   | Al-Moundhri 2004           |
| PAK     | 261   | 2012-2013; 2013-2015 | Institute of Nuclear Medicine and Oncology Lahore (INMOL); Services Hospital Lahore (SHL)                                                                                                  | Khokher 2016               |
| PAK     | 834   | 1999-2008            | A university hospital in Southern Pakistan                                                                                                                                                 | Kumar 2016                 |
| PAK     | 1299  | 2001-2010            | Aga Khan University Hospital (AKUH) in Karachi                                                                                                                                             | Zeeshan 2019               |
| PAK     | 9461  | 1994-2016            | Liaquat National Hospital, Karachi                                                                                                                                                         | Soomro 2018                |
| PAK     | 6214  | 2004-2012            | Shaukat Khanum Memorial Cancer Hospital and Research Centre, Lahore                                                                                                                        | Badar 2015                 |
| PER     | 91    | 2015                 | Tertiary care referral cancer center in Trujillo, Peru                                                                                                                                     | Romanoff 2017              |
| PER     | 75    |                      | [Systematic review: de Lemos 2019]                                                                                                                                                         | Larrea-Fernández 2016      |
| PER     | 545   |                      | [Systematic review: de Lemos 2019]                                                                                                                                                         | Díaz-Vélez 2013            |
| PER     | 1505  |                      | [Systematic review: de Lemos 2019]                                                                                                                                                         | Gutiérrez and Alarcón 2008 |
| PHL     | 1166  | 1993-2002            | Philippine Cancer Society-Manila Cancer Registry and the Department of Health-Rizal Cancer Registry                                                                                        | Laudico 2009               |
| PRT     | 1229  | 2005                 | Southern Portugal Cancer Registry (ROR-Sul)                                                                                                                                                | Andre 2014                 |
| PRT     | 551   | 2000-2007            | North Region Cancer Registry                                                                                                                                                               | Jose Bento 2014            |
| PRY     | 80    |                      | [Systematic review: de Lemos 2019]                                                                                                                                                         | Yoffe de Quiroz 2005       |
| ROU     | 173   | 2000-2005            | Municipal Clinical Hospital, Timisoara                                                                                                                                                     | Zaha 2010                  |
| ROU     | 22    | Not reported         | Not reported                                                                                                                                                                               | Suciu 2008                 |
| RUS     | 473   | 2009-2012            | N. N. Blokhin Russian Cancer Research Center                                                                                                                                               | Filipenko 2017             |
| RWA     | 42    | Not reported         | King Faisal Hospital and Kigali Teaching Hospital, Kigali                                                                                                                                  | Habyarimana 2018           |
| RWA     | 39    | 2016                 | Rwanda Military Hospital and King Faysal Hospital, Kigali                                                                                                                                  | Habyarimana 2018           |
| RWA     | 142   | 2014-2015            | Butaro Cancer Center of Excellence                                                                                                                                                         | Schleimer 2019             |
| SAU     | 535   | 2007-2012            | Oncology Department at King Faisal Specialist Hospital & Research Center (KFSH&RC), Riyadh                                                                                                 | Elkum 2014                 |
| SAU     | 449   | Not reported         | King Abdulaziz University Hospital                                                                                                                                                         | Khabaz 2017                |
| SDN     | 1249  | 1999-2006            | Institute of Nuclear Medicine, Molecular Biology and Oncology (INMO) at Gezira University, Wadmedani, al-Gezira State                                                                      | Elgaili 2010               |
| SGP     | 8773  | 2011-2015            | Singapore Cancer Registry                                                                                                                                                                  | Annual Report, 2017        |
| SGP     | 1165  | 1990-2002            | National University Hospital Breast Cancer Registry                                                                                                                                        | Lim 2007                   |
| SRB     | 2252  | 1985-1990            | Surgical and Oncological Clinic in Nis                                                                                                                                                     | Djordjevic 2004            |
| SWE     | 247   | 1996-1997            | Swedish Cancer Registry                                                                                                                                                                    | Jensen 2003                |
| THA     | 3251  | 2006-2015            | Chiang Mai cancer registries                                                                                                                                                               | Chitapanarux 2019          |
| TTO     | 362   |                      | [Systematic review: de Lemos 2019]                                                                                                                                                         | Raju and Naraynsingh 1989  |
| TUN     | 70    | 2016-2017            | Fattouma Bourguiba University Hospital of Monastir                                                                                                                                         | Daldoul 2018               |
| TUN     | 1082  | 2003-2007            | Cancer Registry of the Center of Tunisia                                                                                                                                                   | Missaoui 2011              |
| TUR     | 18586 | 2005-2017            | National Breast Cancer Registry Program of Turkish Federation of Breast Diseases Societies                                                                                                 | Ozmen 2019                 |
| TWN     | 29152 | 2004-2008            | Taiwan Cancer Registry                                                                                                                                                                     | Chiang 2016                |



(continued)

| Country | Cases  | Years                | Source                                                                                                     | Reference        |
|---------|--------|----------------------|------------------------------------------------------------------------------------------------------------|------------------|
| TZA     | 74     | 2016-2017            | Muhimbili National Hospital                                                                                | Mansouri 2019    |
| TZA     | 384    | 2002-2011            | Bugando Medical Center, Mwanza                                                                             | Mabula 2012      |
| TZA     | 327    | 2007-2009            | Ocean Road Cancer Institute (ORCI)                                                                         | Burson 2010      |
| UGA     | 194    | 2003-2010            | Kampala Cancer Registry                                                                                    | Menon 2018       |
| UGA     | 162    | 2014                 | Mulago National Referral Hospital                                                                          | Odongo 2015      |
| UGA     | 209    | 2014                 | Mulago National Referral Hospital and Ugandan Cancer Institute                                             | Galukande 2015   |
| URY     | 107    |                      | [Systematic review: de Lemos 2019]                                                                         | Malvasio 2017    |
| URY     | 109    |                      | [Systematic review: de Lemos 2019]                                                                         | Camejo 2013      |
| USA     | 293629 | 2010-2016            | SEER                                                                                                       | SEER 2019        |
| VEN     | 179    |                      | [Systematic review: de Lemos 2019]                                                                         | Rebolledo 2012   |
| VEN     | 411    |                      | [Systematic review: de Lemos 2019]                                                                         | Ferri 2012       |
| VNM     | 1574   | 2001-2006            | Hue Central Hospital and the Cancer Registry in Ho Chi Minh City                                           | Lan 2013         |
| YEM     | 192    | 1998-2002; 2005-2007 | Registry of Algamhouria teaching hospital; Aden public and private hospitals                               | Harhra 2012      |
| ZAF     | 231    | 2016-2017            | Urban South African open-access breast care clinic                                                         | Rayne 2019       |
| ZAF     | 1006   | 2015-2017            | Charlotte Maxeke Johannesburg Academic Hospital and Chris Hani Baragwanath Academic Hospital, Johannesburg | Phakathi 2019    |
| ZAF     | 586    | 2010-2011            | Tygerberg Hospital, Cape Town                                                                              | Langenhoven 2016 |
| ZAF     | 1051   | 2006-2012            | Chris Hani Baragwanath Academic Hospital, Soweto, Johannesburg                                             | Dickens 2014     |

## 1.4 Maximum Achievable Survival

To account for variation in the curability of different cancers, we estimated maximum achievable survival probabilities using 2010–16 data from the Surveillance, Epidemiology, and End Results (SEER) Program by cancer type and stage. We inflated the SEER estimates to account for the possibility of non-optimal service delivery in the USA. This model parameter is used to estimate relative differences in survival by cancer site and stage, and represents the highest possible survival given current knowledge and medical technology.

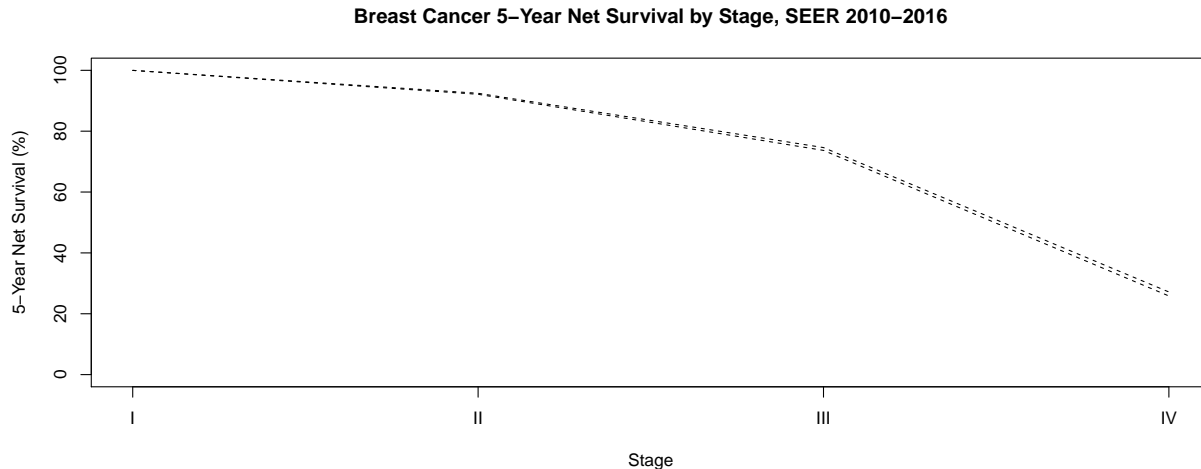

Dashed lines indicate 95% CI.

We inflated these priors by 3 percentage points (up to maximum of 100%) to account for the potential for non-optimal service delivery in the US. When sampling we enforced constraints to ensure that survival was non-increasing by stage.

Reference:

Surveillance, Epidemiology, and End Results (SEER) Program ([www.seer.cancer.gov](http://www.seer.cancer.gov)) SEER\*Stat Database: Incidence - SEER 18 Regs Research Data + Hurricane Katrina Impacted Louisiana Cases, Nov 2018 Sub (2000-2016) - Linked To County Attributes - Total U.S., 1969-2017 Counties, National Cancer Institute, DCCPS, Surveillance Research Program, released April 2019, based on the November 2018 submission.

## 1.5 Modality Efficacy

To set prior probability distributions for the impact of treatment and imaging modalities on stage-specific cancer survival, we used a two-stage survey to elicit expert opinion. A sample of actively practising physicians (33 imaging experts and 22 therapy experts) was selected, based on expertise in their field, both in high-income and low-income settings.

Respondents were asked to indicate the impact of each treatment/imaging modality on 5-year net survival for each cancer/stage using a four-point scale, ranging from necessary for 5-year survival to no impact on 5-year survival. To estimate prior probability distributions for the probability that each modality was necessary, we weighted the responses as follows and estimated Beta distributions with the sum of the weighted estimates.

| Response                | Description                                                      | Weight |
|-------------------------|------------------------------------------------------------------|--------|
| No impact/Not indicated | Not expected to affect 5-yr survival at all                      | 0.0    |
| Small impact            | May improve the probability of 5-yr survival in some cases       | 0.25   |
| Moderate impact         | Likely to improve the probability of 5-yr survival in most cases | 0.75   |
| Necessary               | Use is necessary to achieve 5-yr survival                        | 1.00   |

### 1.5.1 Priors

We plot the estimated priors by stage below.

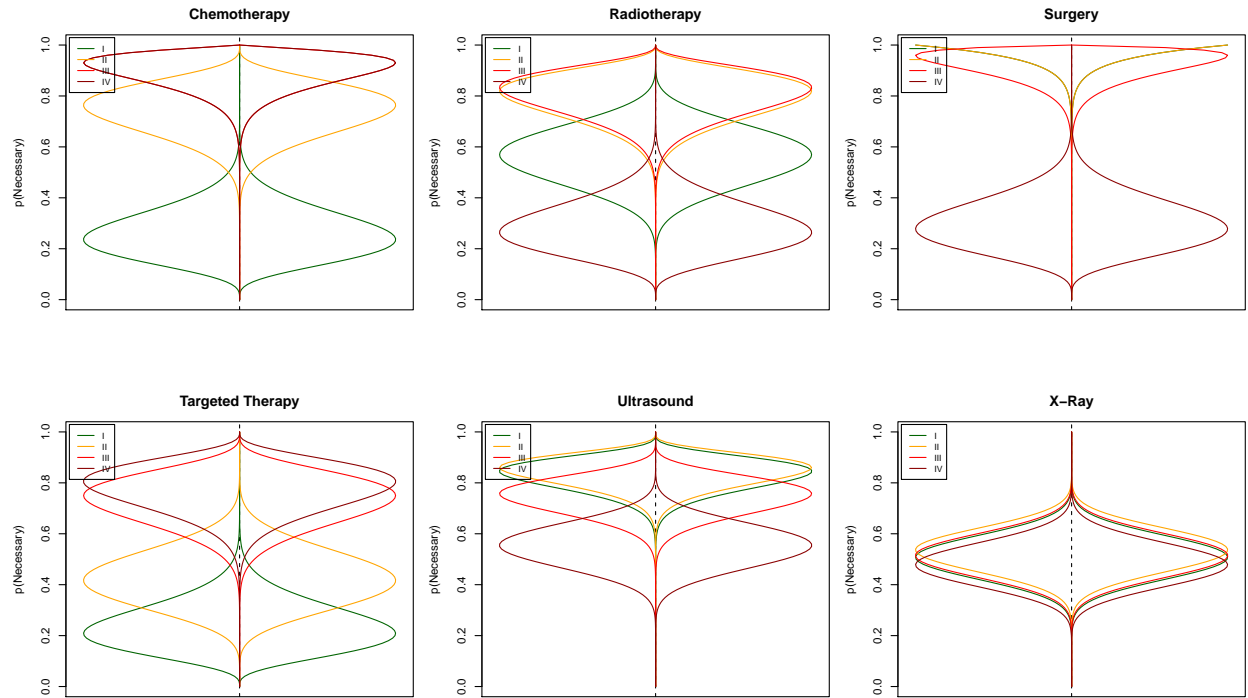

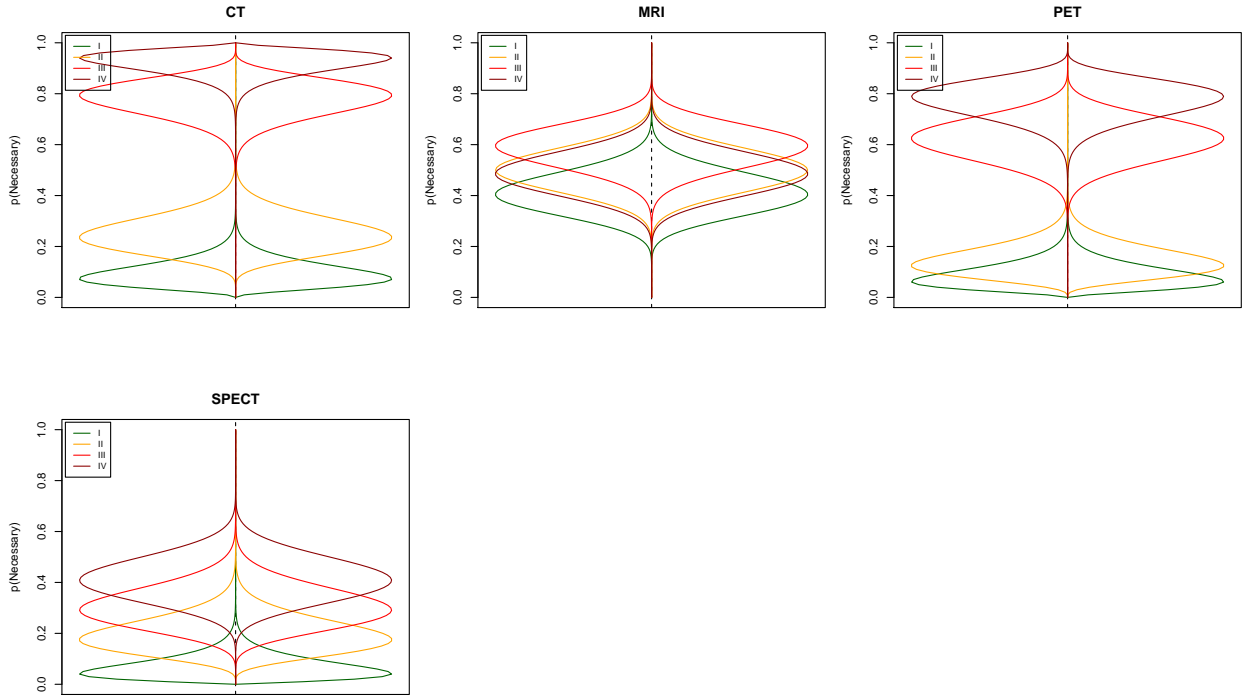

### 1.5.2 Consensus Results

Expert opinion consensus of impact of treatment and imaging modalities on 5-year breast cancer net survival given initial stage at diagnosis

| Modality         | Stage I         | Stage II        | Stage III       | Stage IV  |
|------------------|-----------------|-----------------|-----------------|-----------|
| <i>Treatment</i> |                 |                 |                 |           |
| Chemotherapy     | Small impact    | Necessary       | Necessary       | Necessary |
| Radiotherapy     | Small impact    | Necessary       | Necessary       | No impact |
| Surgery          | Necessary       | Necessary       | Necessary       | No impact |
| Targeted therapy | Small impact    | Moderate impact | Necessary       | Necessary |
| <i>Imaging</i>   |                 |                 |                 |           |
| Ultrasound       | Necessary       | Necessary       | Necessary       | Necessary |
| X-ray            | No impact       | No impact       | No impact       | No impact |
| CT               | No impact       | No impact       | Moderate impact | Necessary |
| MRI              | Moderate impact | Moderate impact | Moderate impact | Necessary |
| PET              | No impact       | No impact       | Moderate impact | Necessary |
| SPECT            | Small impact    | Small impact    | Moderate impact | Necessary |

### 1.5.3 Modern Modalities

We also estimated the proportion of cancer cases expected to benefit from modern modalities (i.e. targeted therapy, CT, MRI, PET, and SPECT). Because these modalities were generally not available until the late 1970s or early 1980s, we analysed trends in stage-specific survival using SEER data between 1973 and 2014 to estimate the level of survival achievable before the introduction of modern modalities.

Here we plot the trends in survival based on SEER data. We used SEER Historic Stage A (Local/Regional/Distant) as it was the only staging system available for historic data.

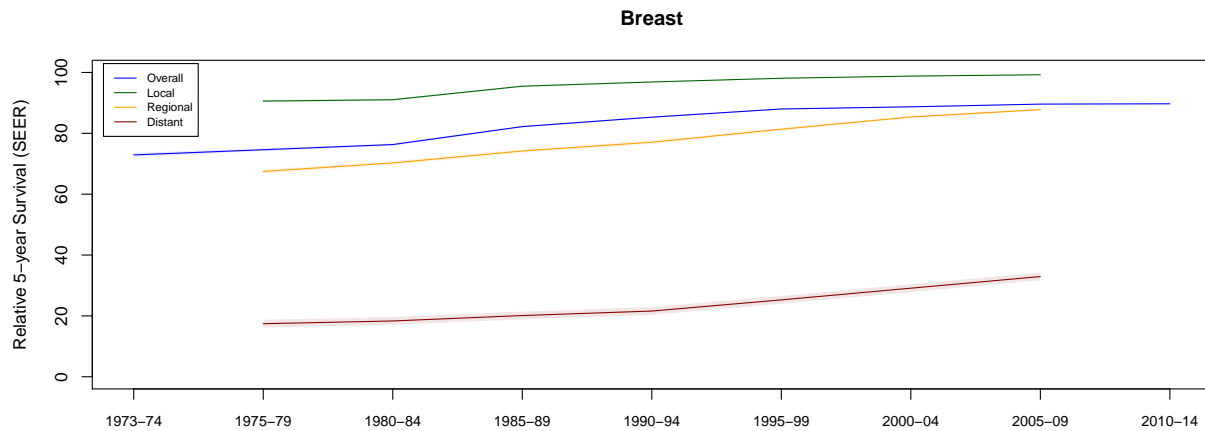

## 1.6 Treatment Availability

To estimate the availability of traditional treatment modalities (chemotherapy, radiotherapy, and surgery), we relied on previously published estimates. We estimated priors of the availability of chemotherapy using data for 94 countries from a published global survey of oncologists (Cohen 2018). Estimates of radiotherapy coverage were available for 173 countries, based on the Lancet Oncology Commission on Expanding Global Access to Radiotherapy (Atun 2015). Surgery estimates were available for 184 countries, based on a modelling study of the Lancet Commission on Global Surgery (Alkire 2015).

Data on the availability of targeted therapy in low- and middle-income countries are scarce, but estimates that are available suggest that patients have limited access to targeted therapy, usually because of the high cost of these therapies (Yip 2015). For example, among 49 new oncology medicines launched between 2010 and 2014, patients in only 6 countries had access to at least half of these drugs (IMS 2016). Furthermore, such drugs are often only accessible for a privileged minority of the population with private health insurance (Ruiz 2017). We therefore set wide priors by income group, centered at 5%, 25%, 75%, and 95%. When sampling parameters we ensured that the probabilities of targeted therapy availability were lower than for chemotherapy in each country to account for the lack of access to targeted therapy.

References:

Alkire BC, Raykar NP, Shrimpe MG, et al. Global access to surgical care: a modelling study. *Lancet Glob Health* 2015; 3: e316–23.

Atun R, Jaffray DA, Barton MB, et al. Expanding global access to radiotherapy. *Lancet Oncol* 2015; 16: 1153–86.

Cohen P, Friedrich P, Lam C, et al. Global access to essential medicines for childhood cancer: a cross-sectional survey. *J Glob Oncol* 2018; 4: 1–11.

IMS Institute for Healthcare Informatics. *Global Oncology Trend Report: A Review of 2015 and Outlook to 2020*. 2016. Available at: <https://www.iqvia.com/-/media/iqvia/pdfs/institute-reports/global-oncology-trend-report-2016.pdf>.

Ruiz R, Strasser-Weippl K, Touya D, et al. Improving access to high-cost cancer drugs in Latin America: Much to be done. *Cancer* 2017; 123(8): 1313–1323.

Yip CH, Buccimazza I, Hartman M, Deo SV, Cheung PS. Improving outcomes in breast cancer for low and middle income countries. *World J Surg* 2015; 39(3): 686–92.

## 1.7 Imaging Availability

We obtained coverage estimates for each imaging modality (i.e. equipment per million population) from the International Atomic Energy Agency IMAGINE database. To estimate probabilities of availability, we set thresholds of minimum coverage density needed to ensure availability. Because there are no general guidelines regarding the ideal number of imaging units per population, we set thresholds based on observed data in high-income countries with relatively low coverage so as not to overestimate the thresholds needed to ensure availability.

The following thresholds were used to estimate priors for the probability that each modality was available:

| Modality   | Threshold (per million) | HIC Mean | Country Examples                             |
|------------|-------------------------|----------|----------------------------------------------|
| Ultrasound | 40                      | 132.0    | Puerto Rico: 16.6, Bahamas: 25.9             |
| X-ray      | 30                      | 110.2    | Puerto Rico: 16.9, Trinidad and Tobago: 21.6 |
| CT         | 10                      | 25.4     | Canada: 15.1, UK: 14.5                       |
| MRI        | 10                      | 16.3     | Canada: 9.9, Czechia: 10.4                   |
| PET        | 1                       | 2.1      | Canada: 1.5, UK: 0.5                         |
| SPECT      | 5                       | 7.7      | UK: 5.7, France: 6.1                         |

(Note: Estimates based on IAEA IMAGINE database estimates as of Jan 14, 2020)

Note however that country-level density thresholds do not take into account how imaging equipment and human resources are distributed within countries, nor potential differences in the availability of imaging for diagnostics versus treatment planning. Therefore, there may not be a direct relationship between imaging density and probabilities of availability, which we fitted via model calibration to observed survival estimates.

Reference: International Atomic Energy Agency. IMAGINE—IAEA Medical imAGIng and Nuclear mEdicine global resources database. <https://humanhealth.iaea.org/HHW/DBStatistics/IMAGINE.html>

## 1.8 Quality of Care

We also included country-specific parameters for quality of care, defined by the Institute of Medicine as the “degree to which health services for individuals and populations increase the likelihood of desired health outcomes and are consistent with current professional knowledge” (IOM 1990). This parameter captures health-system and facility-level factors that account for residual differences in survival not explained by cancer stage or treatment and imaging availability. We set wide priors with increasing probability of quality by income group (25%, 50%, 75%, 95%), and zero-mean priors for the other levels in the hierarchical model.

Adequate quality of care is assumed to be a prerequisite for survival in the model. This parameter can therefore be interpreted as the probability that the quality of care available is adequate to ensure 5-year survival, given the availability of all necessary treatment and imaging modalities.

Reference: Institute of Medicine. Medicare: a strategy for quality assurance. Washington, DC: National Academy Press, 1990.

## 2 Model Calibration

### 2.1 Calibration Overview

As described above, we used Bayesian hierarchical models with four levels (income group, geographical area, geographical region, and country) to synthesise all available estimates and generate prior probability distributions, allowing us to regularise the reported estimates and estimate priors for countries for which no data were available. We used these priors as initial sampling distributions for model calibration and enforced non-decreasing income group intercepts when sampling from the hierarchical models (see Ward 2020).

To ensure our model results were consistent with reported survival data, we calibrated the model to survival estimates from CONCORD-3 (Allemani 2018), reserving a set of randomly sampled estimates as a validation test set. We calibrated the model using a Bayesian approach in which the observed data (i.e. CONCORD survival estimates) are considered fixed, and the model parameters are random variables. To fit the parameters we used a simulated annealing search algorithm (a stochastic optimization approach) to identify good-fitting parameter sets. A goodness-of-fit score for each proposed parameter set was calculated as the sum of the squared distance between the predicted and reported 5-year survival estimates. We weighted each survival target inversely proportional to the width of its confidence interval to allow more precise estimates to have larger influence in the calibration.

We ran 2,000 independent search chains of 1,000 iterations each, and selected the final 100 best-fitting parameter sets to account for uncertainty around the model parameters. When running the final 1,000 simulations we sampled a parameter set (from the best-fitting 100 sets) at random, accounting for both first-order (patient-level stochastic) and second-order (parameter) uncertainty. Our estimated 95% UIs, reported for all model outcomes, therefore indicate the sensitivity of our results to different parameter values and account for their joint distribution.

References:

Allemani C, Matsuda T, Di Carlo V, et al. Global surveillance of trends in cancer survival 2000–14 (CONCORD-3): analysis of individual records 37 513 025 patients diagnosed with one of 18 cancers from 322 population-based registries in 71 countries. *Lancet* 2018; 391: 1023–75.

Ward ZJ, Scott AM, Hricak H, et al. Estimating the impact of treatment and imaging modalities on 5-year net survival of 11 cancers in 200 countries: a simulation-based analysis. *Lancet Oncol* 2020; 21: 1077–88.

### 2.2 Model Performance

Comparing our model results with the CONCORD-3 estimates for breast cancer, our posterior predictive checks of our training set found that our 95% UIs overlapped with the CONCORD 95% CIs 94 · 2% of the time and contained the reported point estimate 80 · 9% of the time. Our validation checks of our test set found that 96 · 0% of our 95% UIs overlapped the CONCORD 95% CIs, with a coverage probability of 82 · 0%.

#### 2.2.1 Training Set Comparisons

Here we plot our modeled breast cancer survival estimates (mean and 95% UI of the posterior predicted estimates) compared to the CONCORD estimates used to calibrate the model (i.e. training set).

Black lines indicate CONCORD estimates and 95% CI. Blue lines and shaded regions indicate modeled means and 95% UI.

**Australia/New Zealand**

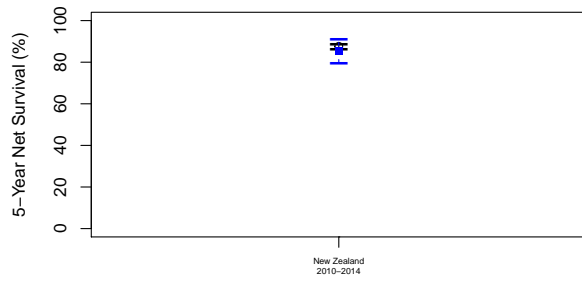

**Caribbean**

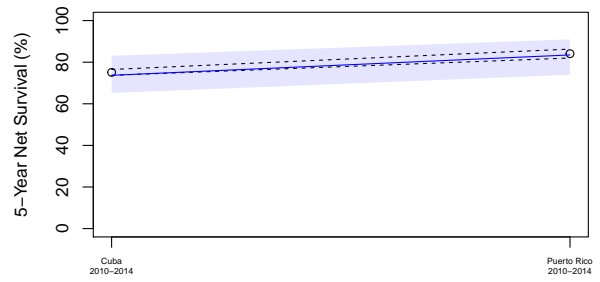

**Central America**

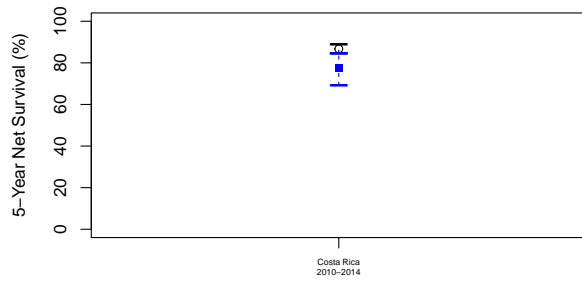

**Eastern Africa**

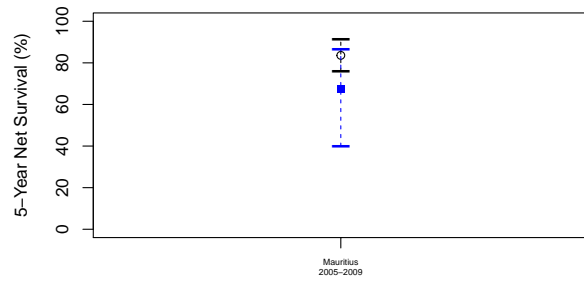

**Eastern Asia**

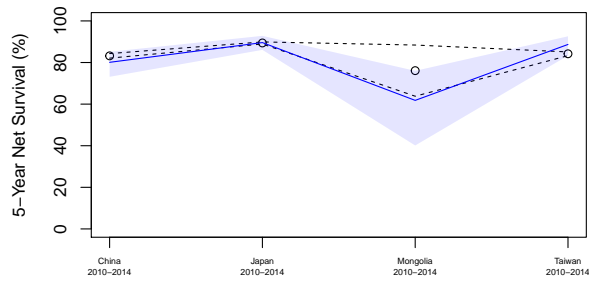

**Eastern Europe**

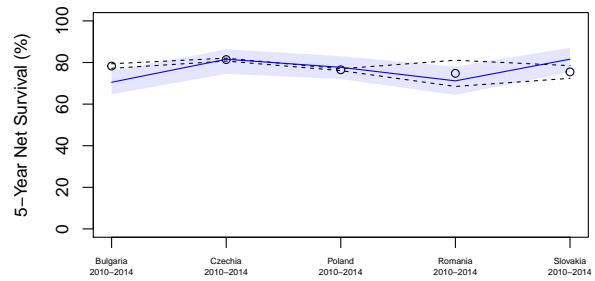

**Northern Africa**

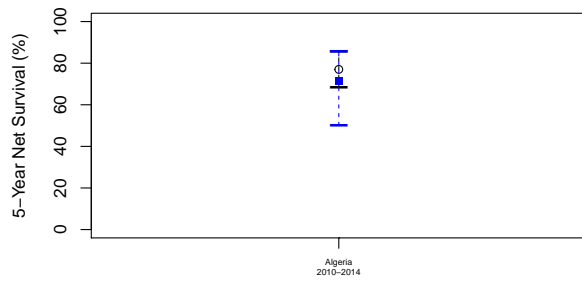

**Northern America**

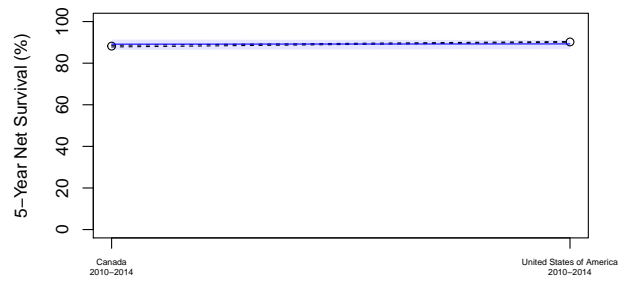

**Northern Europe**

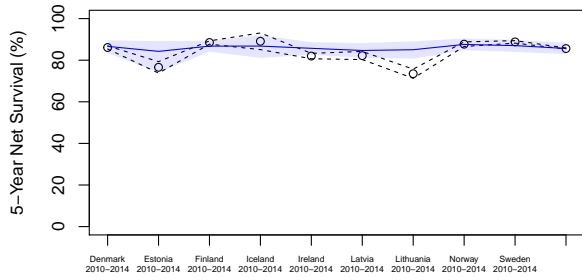

**South-Eastern Asia**

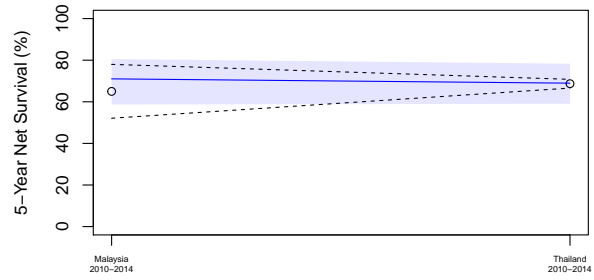

**South America**

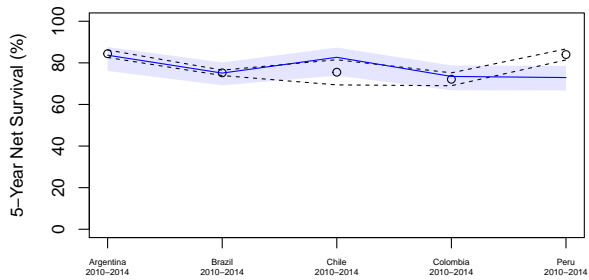

**Southern Africa**

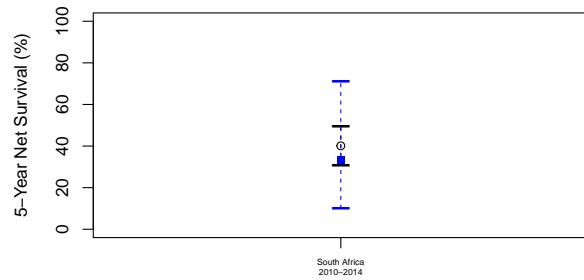

**Southern Asia**

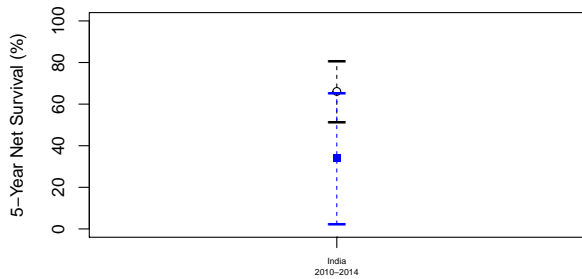

**Southern Europe**

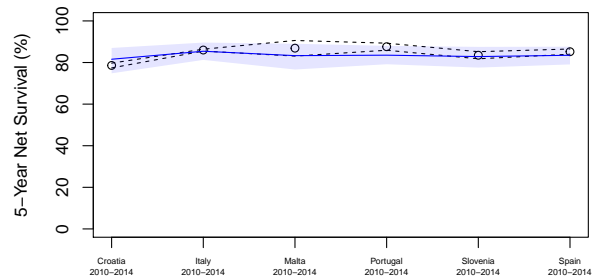

**Western Asia**

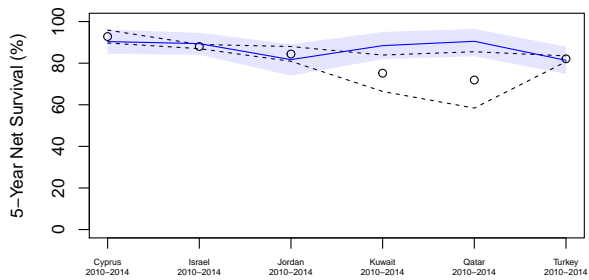

**Western Europe**

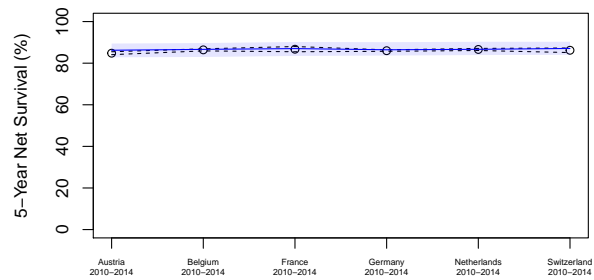



### 2.2.2 Testing Set Comparisons

Here we plot our modeled survival estimates (mean and 95% UI of the posterior predicted estimates) compared to the randomly selected CONCORD estimates not used to calibrate the model (i.e. testing set). Black lines indicate CONCORD estimates and 95% CI. Blue lines and shaded regions indicate modeled means and 95% UI.

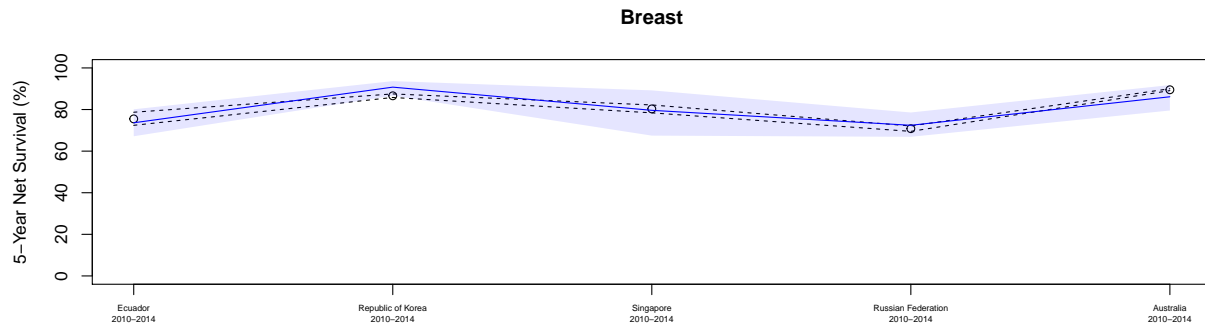

### 3 Calibrated Treatment Impact Parameters

Here we plot the calibrated parameters for the impact of treatment and imaging modalities on breast cancer survival.

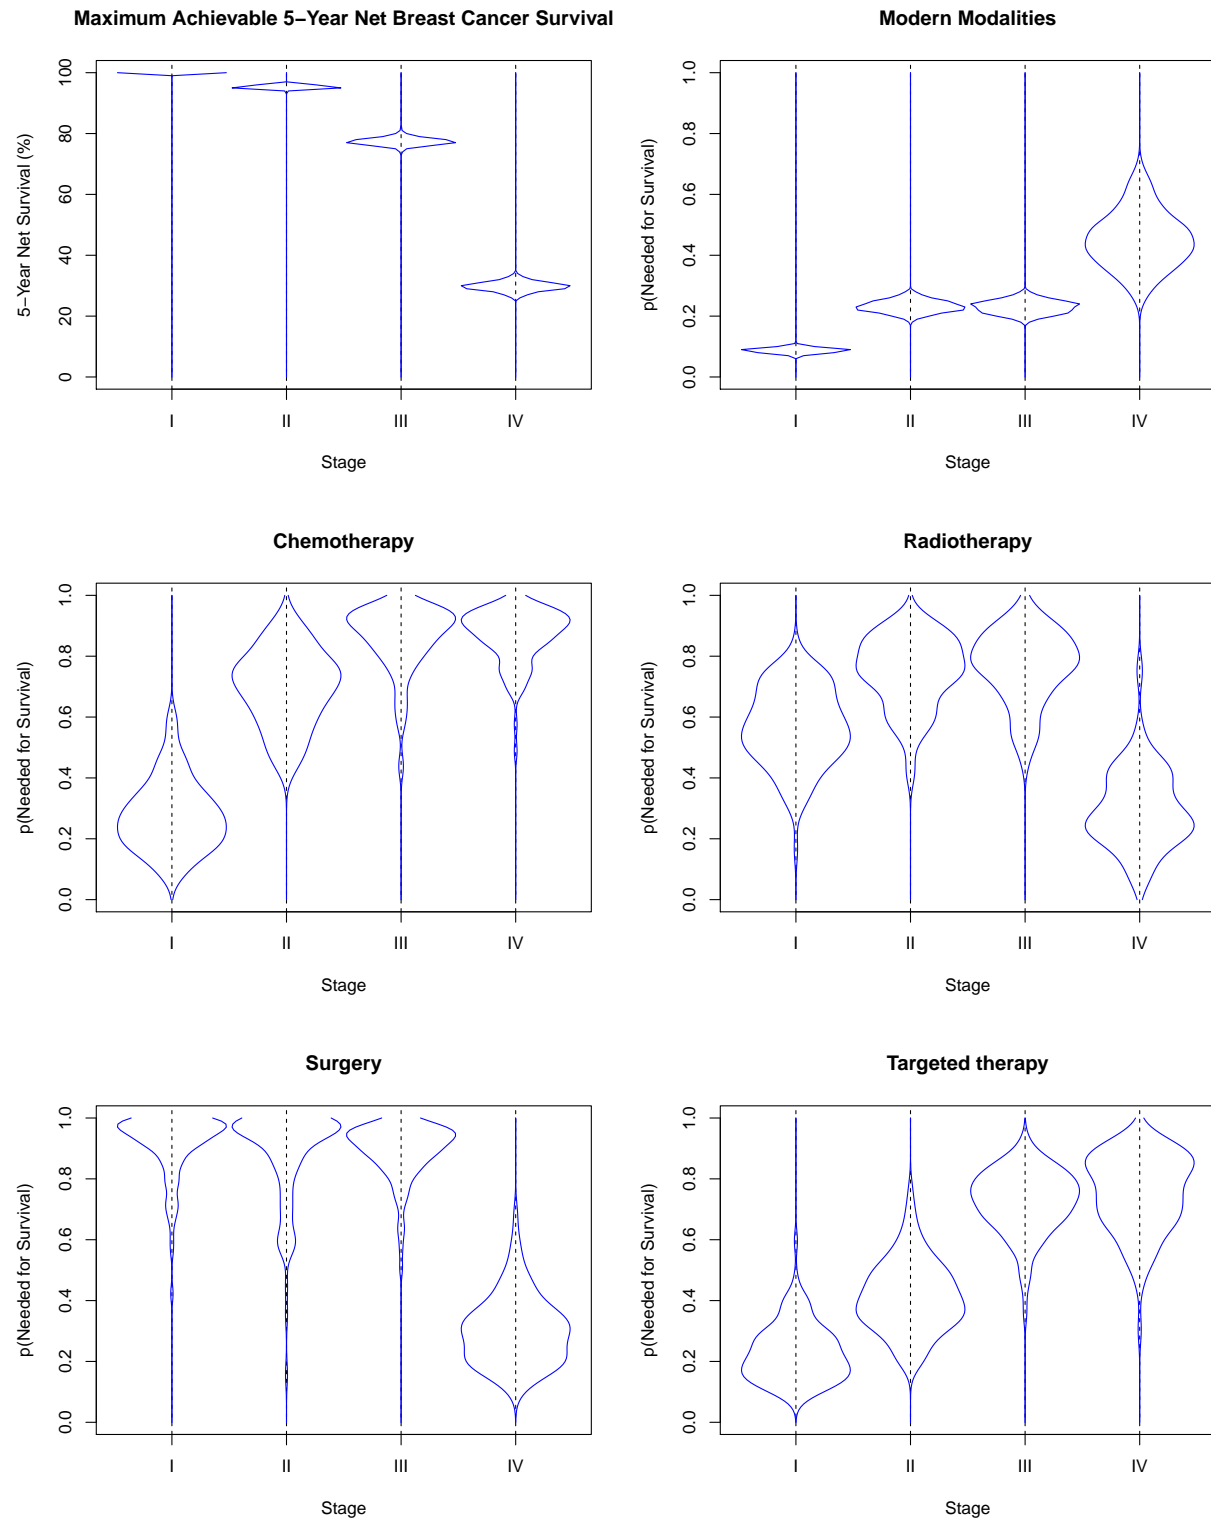

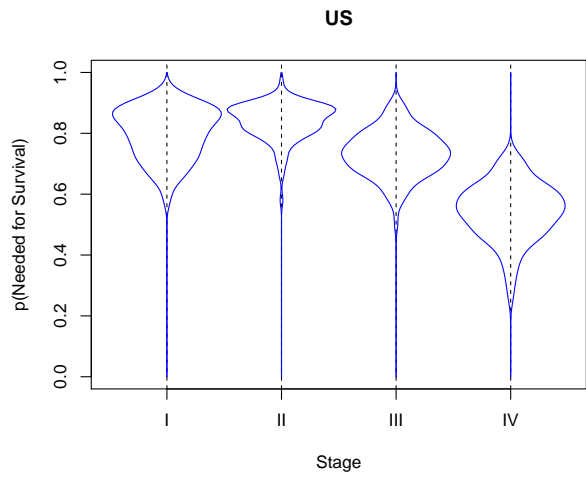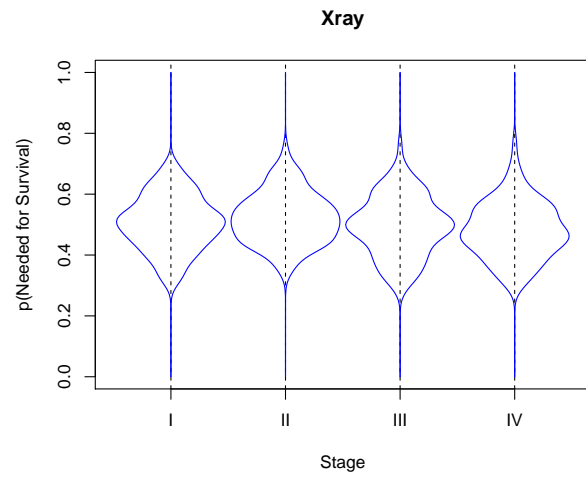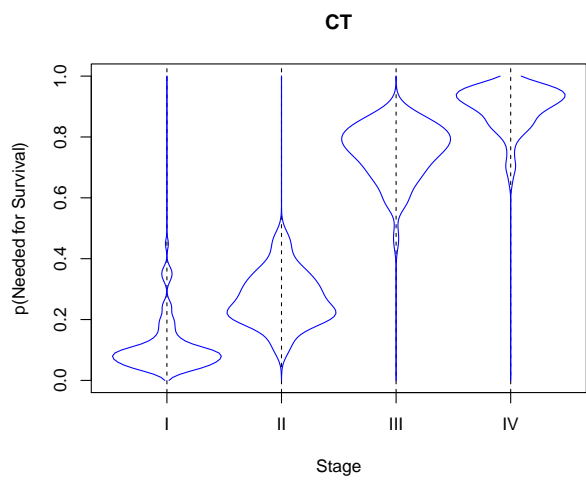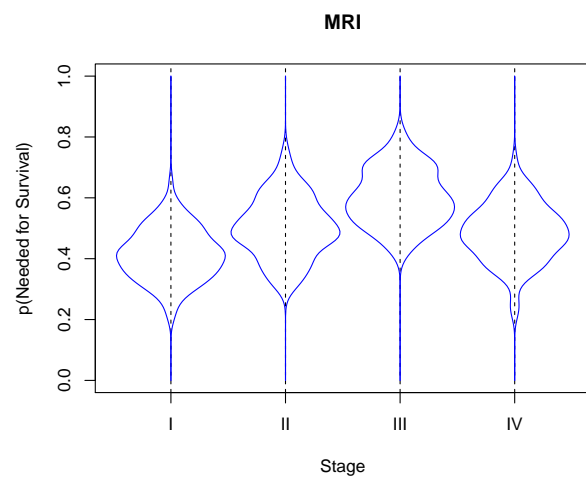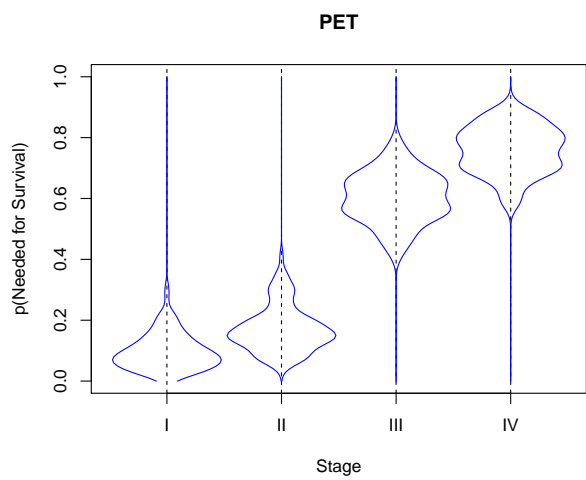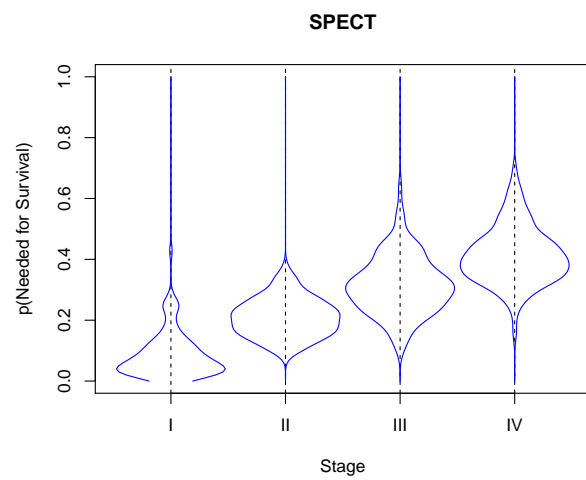

## 4 Additional Results

Estimated Stage III-IV Breast Cancers (%) at Diagnosis

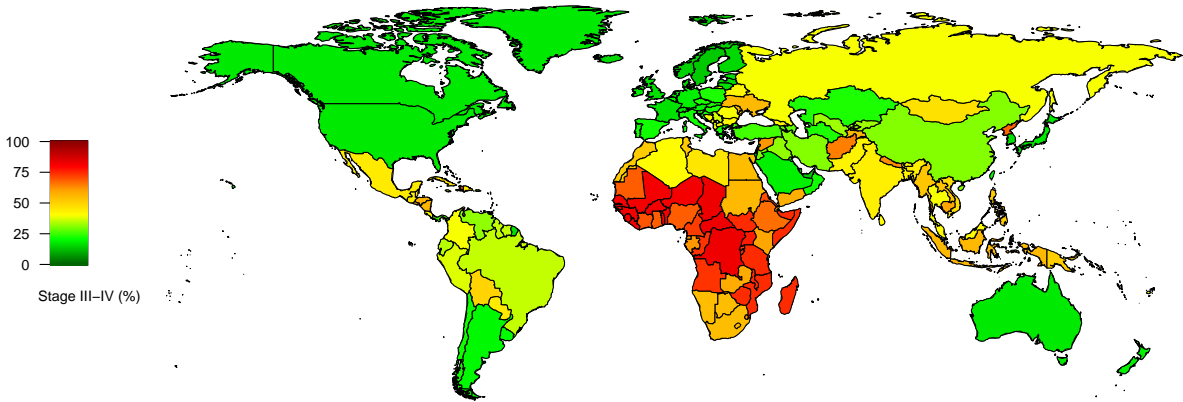

Supplement: NIHMS1743065-supplement-1.pdf [file NIHMS1743065-supplement-1.pdf]
